# Supplementary material
Source: PubMed Central journal article supplement (PMC5793684)
Supplement: asx045_supp.pdf [file asx045_supp.pdf]

# Supplementary Material to Semiparametric Analysis of Complex Polygenic Gene-Environment Interactions in Case-Control Studies

BY ODILE STALDER

Department of Clinical Research, and Institute of Social and Preventive Medicine, University  
of Bern, 3012 Bern, Switzerland

Odile.Stalder@gmail.com

ALEX ASHER, LIANG LIANG, RAYMOND J. CARROLL

Department of Statistics, Texas A&M University, 3143 TAMU, College Station, TX 77843-3143,  
U.S.A.

alexasher@stat.tamu.edu liang@stat.tamu.edu carroll@stat.tamu.edu

YANYUAN MA

Department of Statistics, Penn State University, University Park, PA 16802, U.S.A.

yanyuanma@gmail.com

AND NILANJAN CHATTERJEE

Department of Biostatistics, Bloomberg School of Public Health and Department of Oncology,  
School of Medicine, Johns Hopkins University, Baltimore, MD 21205, U.S.A.

nchatte2@jhu.edu

## S·1. PROOF OF THEOREM 1

### SKETCH OF TECHNICAL ARGUMENTS

#### Necessary U-Statistic theory

Consider the case of one sample. Let  $Z_1, \dots, Z_n$  be independent and identically distributed. Let  $h_*(\cdot)$  be a function such that  $E\{h_*(Z_1, Z_2)\} = 0$ . Define

$$U_{n*} = \sum_{i=1}^n \sum_{j \neq i}^n h_*(Z_i, Z_j) / \{n(n-1)\} = \sum_{i=1}^n \sum_{j < i}^n h_*(Z_i, Z_j) / \{n(n-1)/2\}.$$

If  $h_*(z_1, z_2) \neq h_*(z_2, z_1)$ , we make it symmetric in its arguments by noticing that if

$$h(z_1, z_2) = \{h_*(z_1, z_2) + h_*(z_2, z_1)\} / 2,$$

then

$$U_{n*} = U_n = \sum_{i=1}^n \sum_{j \neq i}^n h(Z_i, Z_j) / \{n(n-1)\}.$$

We recognize  $U_n$  as a U-statistic of order 2 with a symmetric kernel  $h(\cdot)$ . Define

$$h_1(z) = 2E\{h(z, Z_2)\}. \quad (1)$$

Then, as in Theorem 12.3 of Van der Vaart (1998),

$$n^{1/2}U_n = n^{-1/2} \sum_{i=1}^n h_1(Z_i) + o_p(1). \quad (2)$$

Next we consider a special case of two samples, namely the  $n_0$  controls and  $n_1$  cases, denoted as  $(U_1, \dots, U_{n_0})$  and  $(V_1, \dots, V_{n_1})$ , respectively, with  $n = n_0 + n_1$ . The U-statistic of interest is

$$U_n = (n_0 n_1)^{-1} \sum_{i=1}^{n_0} \sum_{j=1}^{n_1} I(D_i = 0) I(D_j = 1) h(U_i, V_j), \quad (3)$$

where  $0 = E\{h(U_i, V_j) \mid D_i = 0, D_j = 1\}$ . Let  $n_0/n \rightarrow \lambda$  and  $n_1/n \rightarrow 1 - \lambda$ , with  $0 < \lambda < 1$ . Define

$$\begin{aligned} h_{1,0}(u) &= E\{h(u, V) \mid D = 1\}; \\ h_{0,1}(v) &= E\{h(U, v) \mid D = 0\}. \end{aligned}$$

Then, from Chapter 12.2 of Van der Vaart (1998),

$$n^{1/2} U_n = n^{1/2} n_0^{-1} \sum_{i=1}^{n_0} I(D_i = 0) h_{1,0}(U_i) + n^{1/2} n_1^{-1} \sum_{j=1}^{n_1} I(D_j = 1) h_{0,1}(V_j) + o_p(1). \quad (4)$$

#### Preliminary Lemma

Let the data be  $Z_i = (D_i, G_i, X_i)$  for  $i = 1, \dots, n$ , ordered so that the first  $n_0$  observations are the controls, and the last  $n_1$  observations are the cases.

Define  $n_d = c_d n$ .

In the proofs, for generic functions  $T(\cdot)$  and  $P(\cdot)$ , we need to deal with terms

$$\begin{aligned} \mathcal{D}_n(P, T) &= \sum_{d=0}^1 (\pi_d / n_d) n^{-1} \sum_{i=1}^n \sum_{j=1}^n \sum_{r=0}^1 I(D_j = d) \\ &\quad \times P(X_i) \{T(r, G_j, X_i) - T_E(r, D_j, X_i)\} \\ &= \sum_{t=0}^1 \sum_{d=0}^1 (\pi_d / n_d) n^{-1} \sum_{i=1}^n \sum_{j=1}^n \sum_{r=0}^1 I(D_i = t, D_j = d) \\ &\quad \times P(X_i) \{T(r, G_j, X_i) - T_E(r, d, X_i)\}, \end{aligned}$$

where

$$T_E(r, d, x) = E\{T(r, G, x) \mid D = d\}.$$

We will use repeatedly the fact that for any constant  $x$ ,

$$0 = E[P(x) \{T(r, G, x) - T_E(r, d, x)\} \mid D = d]. \quad (5)$$

We will make the following notational convention. We define

$$E[P(X) \{T(r, g_i, X) - T_E(r, d, X)\} \mid D = t] \quad (6)$$

to mean

$$E[P(X) \{T(r, g, X) - T_E(r, d, X)\} \mid D = t]_{g=G_i}.$$

Similarly,  $E[P(x_i) \{T(r, G, x_i) - T_E(r, d, x_i)\} \mid D = t]$  is

$$E[P(x) \{T(r, G, x) - T_E(r, d, x)\} \mid D = t]_{x=X_i}.$$

Below, we will prove the following Lemma, which relies of U-statistics of order 2 for one sample and U-statistics of order 1 for independent samples, namely the cases and the controls. We use the notation defined at (6).

LEMMA 1. Define  $Z_i = (D_i, G_i, X_i)$ . As  $n \rightarrow \infty$  in such a way that  $n_d = c_d n$  for  $0 < c_0, c_1 < 1$ ,

$$\begin{aligned} & n^{1/2} \mathcal{D}_n(P, T) \\ &= n^{-1/2} \sum_{i=1}^{n_0} \sum_{d=0}^1 \sum_{r=0}^1 \{c_d \pi_{d_i} / c_{d_i}\} E\{P(X) T(r, g_i, X) \mid D = d\} \\ &\quad - n^{-1/2} n_0 E \left[ P(X) \left\{ \pi_0 \sum_{r=0}^1 T_E(r, 0, X) + \pi_1 \sum_{r=0}^1 T_E(r, 1, X) \right\} \mid D = 0 \right] \\ &\quad - n^{-1/2} n_1 E \left[ P(X) \left\{ \pi_0 \sum_{r=0}^1 T_E(r, 0, X) + \pi_1 \sum_{r=0}^1 T_E(r, 1, X) \right\} \mid D = 1 \right] + o_p(1). \end{aligned}$$

*Proof of Lemma 1*

Now, since there are only  $n$  terms with  $i = j$ , whereas the leading terms before the summations are  $O(n^{-2})$ , and because  $(n-1)^{-1} - n^{-1} = O(n^{-2})$ , and because the first  $n_0$  observations are controls, to order  $n^{1/2}$ , analyzing  $\mathcal{D}_n$  is equivalent to analyzing

$$\mathcal{D}_n(P, T) = \sum_{t=0}^1 \sum_{d=0}^1 \mathcal{D}_n(P, T, t, d) + o_p(n^{-1}),$$

where

$$\begin{aligned} \mathcal{D}_n(P, T, 0, 0) &= (\pi_0/n_0) n^{-1} \sum_{i=1}^{n_0} \sum_{j=1, j \neq i}^{n_0} I(D_i = 0, D_j = 0) \\ &\quad \times P(X_i) \sum_{r=0}^1 \{T(r, G_j, X_i) - T_E(r, 0, X_i)\} \\ &= \{n_0(n_0 - 1)\}^{-1} \sum_{i=1}^{n_0} \sum_{j=1, j \neq i}^{n_0} I(D_i = 0, D_j = 0) \\ &\quad \times (\pi_0 c_0) P(X_i) \sum_{r=0}^1 \{T(r, G_j, X_i) - T_E(r, 0, X_i)\} + O_p(n^{-1}); \end{aligned}$$

$$\begin{aligned} \mathcal{D}_n(P, T, 0, 1) &= (\pi_1/n_1) n^{-1} \sum_{i=1}^{n_0} \sum_{j=n_0+1}^n I(D_i = 0, D_j = 1) \\ &\quad \times P(X_i) \sum_{r=0}^1 \{T(r, G_j, X_i) - T_E(r, 1, X_i)\} \\ &= (n_0 n_1)^{-1} \sum_{i=1}^{n_0} \sum_{j=n_0+1}^n I(D_i = 0, D_j = 1) \\ &\quad \times (\pi_1 c_0) P(X_i) \sum_{r=0}^1 \{T(r, G_j, X_i) - T_E(r, 1, X_i)\}; \end{aligned}$$

$$\begin{aligned} \mathcal{D}_n(P, T, 1, 0) &= (\pi_0/n_0) n^{-1} \sum_{i=n_0+1}^n \sum_{j=1}^{n_0} I(D_i = 1, D_j = 0) \\ &\quad \times P(X_i) \sum_{r=0}^1 \{T(r, G_j, X_i) - T_E(r, 0, X_i)\} \\ &= (n_0 n_1)^{-1} \sum_{i=1}^{n_0} \sum_{j=n_0+1}^n I(D_i = 0, D_j = 1) \\ &\quad \times (\pi_0 c_1) P(X_j) \sum_{r=0}^1 \{T(r, G_i, X_j) - T_E(r, 0, X_j)\}; \end{aligned}$$

$$\begin{aligned} \mathcal{D}_n(P, T, 1, 1) &= (\pi_1/n_1) n^{-1} \sum_{i=n_0+1}^n \sum_{j=n_0+1, j \neq i}^n I(D_i = 1, D_j = 1) \\ &\quad \times P(X_i) \sum_{r=0}^1 \{T(r, G_j, X_i) - T_E(r, 1, X_i)\} \\ &= \{n_1(n_1 - 1)\}^{-1} \sum_{i=n_0+1}^n \sum_{j=n_0+1, j \neq i}^n I(D_i = 1, D_j = 1) \\ &\quad \times (\pi_1 c_1) P(X_i) \sum_{r=0}^1 \{T(r, G_j, X_i) - T_E(r, 1, X_i)\} + O_p(n^{-1}). \end{aligned}$$

Now,  $\mathcal{D}_n(P, T, 1, 0)$  and  $\mathcal{D}_n(P, T, 0, 1)$  are U-statistics of order 1 for 2 independent samples, while  $\mathcal{D}_n(P, T, 0, 0)$  and  $\mathcal{D}_n(P, T, 1, 1)$  are U-statistics of order 2 for a single sample, all with asymmetric kernels.

We next analyze  $\mathcal{D}_n(P, T, 0, 1)$ . The term  $\mathcal{D}_n(P, T, 0, 1)$  has kernel

$$h(Z_i, Z_j, 0, 1) = (\pi_1 c_0) P(X_i) \sum_{r=0}^1 \{T(r, G_j, X_i) - T_E(r, 1, X_i)\}.$$

Then

$$\begin{aligned} h_{1,0}(u, 0, 1) &= E\{h(u, Z_j, 0, 1) \mid D_j = 1\} = 0, \text{ by (5);} \\ h_{0,1}(v, 0, 1) &= E\{h(Z_i, v) \mid D_i = 0\} \\ &= (\pi_1 c_0) E \left[ P(X) \sum_{r=0}^1 \{T(r, v, X) - T_E(r, 1, X)\} \mid D = 0 \right]. \end{aligned}$$

Thus, from (4),

$$\begin{aligned} n^{1/2} \mathcal{D}_n(P, T, 0, 1) &= (n^{1/2}/n_1) \sum_{j=n_0+1}^n h_{0,1}(Z_j, 0, 1) + o_p(1) \\ &= n^{-1/2} \sum_{j=n_0+1}^n c_1^{-1} h_{0,1}(Z_j, 0, 1) + o_p(1). \end{aligned} \quad (7)$$

In the notation defined at (6),

$$\begin{aligned} n^{1/2} \mathcal{D}_n(P, T, 0, 1) &= n^{-1/2} \sum_{j=n_0+1}^n (\pi_1 c_0 / c_1) I(D_j = 1) \\ &\quad \times \sum_{r=0}^1 E [P(X) \{T(r, g_j, X) - T_E(r, 1, X)\} \mid D = 0] + o_p(1) \\ &= n^{-1/2} \sum_{i=n_0+1}^n I(D_i = 1) \\ &\quad \times (\pi_1 c_0 / c_1) \sum_{r=0}^1 E [P(X) \{T(r, g_i, X) - T_E(r, 1, X)\} \mid D = 0] + o_p(1). \end{aligned} \quad (8)$$

Now consider the term  $\mathcal{D}_n(P, T, 1, 0)$ , which has kernel

$$h(Z_i, Z_j, 1, 0) = (\pi_0 c_1) P(X_j) \sum_{r=0}^1 \{T(r, G_i, X_j) - T_E(r, 0, X_j)\}.$$

Then

$$\begin{aligned} h_{1,0}(u, 1, 0) &= E\{h(u, Z_j, 1, 0) \mid D_j = 1\} \\ &= (\pi_0 c_1) E \left[ P(X_j) \sum_{r=0}^1 \{T(r, u, X_j) - T_E(r, 0, X_j)\} \mid D_j = 1 \right]; \\ h_{0,1}(v, 1, 0) &= E\{h(Z_i, v, 1, 0) \mid D_i = 0\} = 0, \text{ by (5).} \end{aligned}$$

Thus, from (4),

$$\begin{aligned} n^{1/2} \mathcal{D}_n(P, T, 1, 0) &= (n^{1/2}/n_0) \sum_{i=1}^{n_0} h_{1,0}(Z_i, 1, 0) + o_p(1) \\ &= n^{-1/2} \sum_{i=1}^{n_0} c_0^{-1} h_{1,0}(Z_i, 1, 0) + o_p(1). \end{aligned} \quad (9)$$

In the notation defined at (6),

$$\begin{aligned} n^{1/2} \mathcal{D}_n(P, T, 1, 0) &= n^{-1/2} \sum_{i=1}^{n_0} I(D_i = 0) (\pi_0 c_1 / c_0) \\ &\quad \times \sum_{r=0}^1 E [P(X) \{T(r, g_i, X) - T_E(r, 0, X)\} \mid D = 1] + o_p(1). \end{aligned} \quad (10)$$

We next analyze  $\mathcal{D}_n(P, T, 0, 0)$ , which is a U-statistic of order 2 but with an asymmetric kernel

$$h_*(Z_i, Z_j, 0, 0) = I(D_i = D_j = 0) (\pi_0 c_0) P(X_i) \sum_{r=0}^1 \{T(r, G_j, X_i) - T_E(r, 0, X_i)\}.$$

To make this a symmetric kernel, we define

$$\begin{aligned} h(Z_i, Z_j, 0, 0) &= (1/2) I(D_i = D_j = 0) (\pi_0 c_0) \left[ P(X_i) \sum_{r=0}^1 \{T(r, G_j, X_i) - T_E(r, 0, X_i)\} \right. \\ &\quad \left. + P(X_j) \sum_{r=0}^1 \{T(r, G_i, X_j) - T_E(r, 0, X_j)\} \right]. \end{aligned}$$

We now apply (1), so that

$$\begin{aligned} h_1(z, 0, 0) &= (\pi_0 c_0) E \left[ P(x) \sum_{r=0}^1 \{T(r, G, x) - T_E(r, 0, x)\} \mid D = 0 \right] \\ &\quad + (\pi_0 c_0) E \left[ P(X) \sum_{r=0}^1 \{T(r, g, X) - T_E(r, 0, X)\} \mid D = 0 \right] \\ &= (\pi_0 c_0) E \left[ P(X) \sum_{r=0}^1 \{T(r, g, X) - T_E(r, 0, X)\} \mid D = 0 \right], \text{ by (5)}. \end{aligned}$$

From (2), this means that

$$\begin{aligned} n^{1/2} \mathcal{D}_n(P, T, 0, 0) &= (n^{1/2}/n_0) \sum_{i=1}^{n_0} h_1(Z_i, 0, 0) + o_p(1) \\ &= (n^{-1/2}/c_0) \sum_{i=1}^{n_0} h_1(Z_i, 0, 0) + o_p(1). \end{aligned}$$

Thus, in the notation defined at (6),

$$\begin{aligned} n^{1/2} \mathcal{D}_n(P, T, 0, 0) &= n^{-1/2} \sum_{i=1}^{n_0} I(D_i = 0) \pi_0 \\ &\quad \times \sum_{r=0}^1 E \left[ P(X) \{T(r, g_i, X) - T_E(r, 0, X)\} \mid D = 0 \right] + o_p(1). \end{aligned} \quad (11)$$

We next analyze  $\mathcal{D}_n(P, T, 1, 1)$ , which is a U-statistic of order 2 but with an asymmetric kernel

$$h_*(Z_i, Z_j, 1, 1) = I(D_i = D_j = 1) (\pi_1 c_1) P(X_i) \sum_{r=0}^1 \{T(r, G_j, X_i) - T_E(r, 1, X_i)\}.$$

To make this a symmetric kernel, we define

$$\begin{aligned} h(Z_i, Z_j, 1, 1) &= (1/2) I(D_i = D_j = 1) (\pi_1 c_1) \left[ P(X_i) \sum_{r=0}^1 \{T(r, G_j, X_i) - T_E(r, 1, X_i)\} \right. \\ &\quad \left. + P(X_j) \sum_{r=0}^1 \{T(r, G_i, X_j) - T_E(r, 1, X_j)\} \right]. \end{aligned}$$

We now apply (1), so that

$$\begin{aligned} h_1(z, 1, 1) &= (\pi_1 c_1) E \left[ P(x) \sum_{r=0}^1 \{T(r, G, x) - T_E(r, 1, x)\} \mid D = 1 \right] \\ &\quad + (\pi_1 c_1) E \left[ P(X) \sum_{r=0}^1 \{T(r, g, X) - T_E(r, 1, X)\} \mid D = 1 \right] \\ &= (\pi_1 c_1) E \left[ P(X) \sum_{r=0}^1 \{T(r, g, X) - T_E(r, 1, X)\} \mid D = 1 \right], \text{ by (5)}. \end{aligned}$$

From (2),

$$\begin{aligned} n^{1/2} \mathcal{D}_n(P, T, 1, 1) &= (n^{1/2}/n_1) \sum_{i=n_0+1}^n h_1(Z_i, 1, 1) + o_p(1) \\ &= (n^{-1/2}/c_1) \sum_{i=n_0+1}^n h_1(Z_i, 1, 1) + o_p(1). \end{aligned}$$

Thus, in the notation at (6),

$$\begin{aligned} n^{1/2} \mathcal{D}_n(P, T, 1, 1) &= n^{-1/2} \sum_{i=n_0+1}^n I(D_i = 1) \\ &\quad \times \pi_1 E \left[ P(X) \sum_{r=0}^1 \{T(r, g_i, X) - T_E(r, 1, X)\} \mid D = 1 \right] + o_p(1). \end{aligned} \quad (12)$$

Collecting the terms (8), (10), (11) and (12), we get that

$$\begin{aligned}
& n^{1/2}\mathcal{D}_n(P, T) \\
&= n^{-1/2}\sum_{i=1}^{n_0} I(D_i = 0)\pi_0\sum_{r=0}^1 E [P(X) \{T(r, g_i, X) - T_E(r, 0, X)\} | D = 0] \\
&\quad + n^{-1/2}\sum_{i=1}^{n_0} I(D_i = 0)(\pi_0 c_1/c_0)\sum_{r=0}^1 E [P(X) \{T(r, g_i, X) - T_E(r, 0, X)\} | D = 1] \\
&\quad + n^{-1/2}\sum_{i=n_0+1}^n I(D_i = 1)\pi_1 E \left[ P(X)\sum_{r=0}^1 \{T(r, g_i, X) - T_E(r, 1, X)\} | D = 1 \right] \\
&\quad + n^{-1/2}\sum_{i=n_0+1}^n I(D_i = 1)(\pi_1 c_0/c_1)\sum_{r=0}^1 E [P(X) \{T(r, g_i, X) - T_E(r, 1, X)\} | D = 0] \\
&\quad + o_p(1).
\end{aligned}$$

This in turn is seen to be

$$n^{1/2}\mathcal{D}_n(P, T) = \mathcal{G}_1 - \mathcal{G}_2 + o_p(1),$$

80 where

$$\begin{aligned}
\mathcal{G}_1(P, T) &= n^{-1/2}\sum_{i=1}^n \sum_{d=0}^1 \sum_{r=0}^1 (c_d \pi_{d_i} / c_{d_i}) E \{P(X) T(r, g_i, X) | D = d\}; \\
\mathcal{G}_2(P, T) &= n^{-1/2}\sum_{i=n_0+1}^n \sum_{r=0}^1 I(D_i = 0)\pi_0 E \{P(X) T_E(r, 0, X) | D = 0\} \\
&\quad + n^{-1/2}\sum_{i=1}^{n_0} \sum_{r=0}^1 I(D_i = 0)(\pi_0 c_1/c_0) E \{P(X) T_E(r, 0, X) | D = 1\} \\
&\quad + n^{-1/2}\sum_{i=n_0+1}^n \sum_{r=0}^1 I(D_i = 1)\pi_1 E \{P(X) T_E(r, 1, X) | D = 1\} \\
&\quad + n^{-1/2}\sum_{i=n_0+1}^n \sum_{r=0}^1 I(D_i = 1)(\pi_1 c_0/c_1) \sum_{r=0}^1 E \{P(X) T_E(r, 1, X) | D = 0\}.
\end{aligned}$$

It is easily seen that

$$\begin{aligned}
\mathcal{G}_2(P, T) &= n^{-1/2}n_0 E \left[ P(X) \left\{ \pi_0 \sum_{r=0}^1 T_E(r, 0, X) \right\} | D = 0 \right] \\
&\quad + n^{-1/2}n_1 E \left[ P(X) \left\{ \pi_0 \sum_{r=0}^1 T_E(r, 0, X) \right\} | D = 1 \right] \\
&\quad + n^{-1/2}n_1 E \left[ P(X) \left\{ \pi_1 \sum_{r=0}^1 T_E(r, 1, X) \right\} | D = 1 \right] \\
&\quad + n^{-1/2}n_0 E \left[ P(X) \left\{ \pi_1 \sum_{r=0}^1 T_E(r, 1, X) \right\} | D = 0 \right] \\
&= n^{-1/2}n_0 E \left[ P(X) \left\{ \pi_0 \sum_{r=0}^1 T_E(r, 0, X) + \pi_1 \sum_{r=0}^1 T_E(r, 1, X) \right\} | D = 0 \right] \\
&\quad + n^{-1/2}n_1 E \left[ P(X) \left\{ \pi_0 \sum_{r=0}^1 T_E(r, 0, X) + \pi_1 \sum_{r=0}^1 T_E(r, 1, X) \right\} | D = 1 \right].
\end{aligned}$$

This completes the proof of Lemma 1.

#### *Proof of Theorem 1*

With a first-order Taylor series expansion, it is readily seen that

$$n^{-1/2}\sum_{i=1}^n \left\{ \frac{S_\Omega(D_i, G_i, X_i, \widehat{\Omega})}{S(D_i, G_i, X_i, \widehat{\Omega})} - \frac{S_\Omega(D_i, G_i, X_i, \Omega)}{S(D_i, G_i, X_i, \Omega)} \right\} = \Gamma_1 n^{1/2}(\widehat{\Omega} - \Omega) + o_p(1).$$

85 Similarly,

$$n^{-1/2}\sum_{i=1}^n \left\{ \frac{\widehat{R}_\Omega(X_i, \widehat{\Omega})}{\widehat{R}(X_i, \widehat{\Omega})} - \frac{\widehat{R}_\Omega(X_i, \Omega)}{\widehat{R}(X_i, \Omega)} \right\} = \Gamma_2 n^{1/2}(\widehat{\Omega} - \Omega) + o_p(1).$$

In a manner similar to that of Wei et al. (2013), we have that

$$\begin{aligned}
0 &= \widehat{\mathcal{S}}_n(\widehat{\Omega}) = \widehat{\mathcal{S}}_n(\Omega) + n^{-1/2} \frac{\partial \widehat{\mathcal{S}}_n(\Omega)}{\partial \Omega^T} n^{1/2} (\widehat{\Omega} - \Omega) + o_p(1) \\
&= \widehat{\mathcal{S}}_n(\Omega) + (\Gamma_1 - \Gamma_2) n^{1/2} (\widehat{\Omega} - \Omega) + o_p(1) \\
&= \mathcal{S}_n(\Omega) - n^{-1/2} \sum_{i=1}^n \left\{ \frac{\widehat{R}_\Omega(X_i, \Omega)}{\widehat{R}(X_i, \Omega)} - \frac{R_\Omega(X_i, \Omega)}{R(X_i, \Omega)} \right\} \\
&\quad + (\Gamma_1 - \Gamma_2) n^{1/2} (\widehat{\Omega} - \Omega) + o_p(1). \tag{13}
\end{aligned}$$

We now analyze the second term in (13), which equals

$$\begin{aligned}
&n^{-1/2} \sum_{i=1}^n \left[ \frac{\widehat{R}_\Omega(X_i, \Omega) - R_\Omega(X_i, \Omega)}{R(X_i, \Omega)} - \frac{R_\Omega(X_i, \Omega) \{ \widehat{R}(X_i, \Omega) - R(X_i, \Omega) \}}{R^2(X_i, \Omega)} \right] + o_p(1) \\
&= n^{-1/2} \sum_{i=1}^n P_1(X_i, \Omega) \{ \widehat{R}_\Omega(X_i, \Omega) - R_\Omega(X_i, \Omega) \} \\
&\quad - n^{-1/2} \sum_{i=1}^n P_2(X_i, \Omega) \{ \widehat{R}(X_i, \Omega) - R(X_i, \Omega) \} + o_p(1).
\end{aligned}$$

Thus,

$$\begin{aligned}
\mathcal{C}_n &= n^{-1/2} \sum_{i=1}^n \left\{ \frac{\widehat{R}_\Omega(X_i, \Omega)}{\widehat{R}(X_i, \Omega)} - \frac{R_\Omega(X_i, \Omega)}{R(X_i, \Omega)} \right\} \\
&= n^{-1/2} \sum_{i=1}^n \frac{\widehat{R}_\Omega(X_i, \Omega) - R_\Omega(X_i, \Omega)}{R(X_i, \Omega)} \\
&\quad - n^{-1/2} \sum_{i=1}^n \frac{R_\Omega(X_i, \Omega)}{R^2(X_i, \Omega)} \{ \widehat{R}(X_i, \Omega) - R(X_i, \Omega) \} + o_p(1) \\
&= \mathcal{C}_{n1} - \mathcal{C}_{n2} + o_p(1).
\end{aligned}$$

First, we calculate that

$$\begin{aligned}
\widehat{R}(x, \Omega) - R(x, \Omega) &= \sum_{j=1}^n \sum_{r=0}^1 \sum_{d=0}^1 (\pi_d/n_d) I(D_j = d) S(r, G_j, x, \Omega) \\
&\quad - \sum_{r=0}^1 \sum_{d=0}^1 \pi_d S_E(r, d, x, \Omega) \\
&= \sum_{j=1}^n \left\{ \sum_{r=0}^1 \sum_{d=0}^1 (\pi_d/n_d) I(D_j = d) S(r, G_j, x, \Omega) \right. \\
&\quad \left. - \sum_{r=0}^1 \sum_{d=0}^1 (\pi_d/n_d) I(D_j = d) S_E(r, d, x, \Omega) \right\} \\
&= \sum_{d=0}^1 n_d^{-1} \sum_{j=1}^n \sum_{r=0}^1 I(D_j = d) \pi_d \\
&\quad \times \{ S(r, G_j, x, \Omega) - S_E(r, d, x, \Omega) \}. \tag{14}
\end{aligned}$$

Similarly,

$$\begin{aligned}
\widehat{R}_\Omega(x, \Omega) - R_\Omega(x, \Omega) &= \sum_{d=0}^1 n_d^{-1} \sum_{j=1}^n \sum_{r=0}^1 I(D_j = d) \pi_d \\
&\quad \times \{ S_\Omega(r, G_j, x, \Omega) - S_{E, \Omega}(r, d, x, \Omega) \}. \tag{15}
\end{aligned}$$

Then, from (14) and (15),

$$\begin{aligned}
\mathcal{C}_{n1} &= n^{-1/2} \sum_{i=1}^n P_1(X_i, \Omega) \{ \widehat{R}_\Omega(X_i, \Omega) - R_\Omega(X_i, \Omega) \} \\
&= \sum_{d=0}^1 (\pi_d/n_d) n^{-1/2} \sum_{i=1}^n P_1(X_i, \Omega) \\
&\quad \times \sum_{j=1}^n \sum_{r=0}^1 I(D_j = d) \{ S_\Omega(r, G_j, X_i, \Omega) - S_{E,\Omega}(r, D_j, X_i, \Omega) \}; \\
\mathcal{C}_{n2} &= n^{-1/2} \sum_{i=1}^n P_2(X_i, \Omega) \{ \widehat{R}(X_i, \Omega) - R(X_i, \Omega) \} \\
&= \sum_{d=0}^1 (\pi_d/n_d) n^{-1/2} \sum_{i=1}^n P_2(X_i, \Omega) \\
&\quad \times \sum_{j=1}^n \sum_{r=0}^1 I(D_j = d) \{ S(r, G_j, X_i, \Omega) - S_E(r, D_j, X_i, \Omega) \}.
\end{aligned}$$

In the notation defined at (6),

$$\begin{aligned}
\mathcal{C}_{n1} &= n^{1/2} \mathcal{D}_n(P_1, S_\Omega) + o_p(1); \\
\mathcal{C}_{n2} &= n^{1/2} \mathcal{D}_n(P_2, S) + o_p(1).
\end{aligned}$$

Thus, with Lemma 1,

$$\begin{aligned}
\mathcal{C}_n &= \mathcal{C}_{n1} - \mathcal{C}_{n2} + o_p(1) \\
&= n^{-1/2} \sum_{i=1}^n \sum_{d=0}^1 \sum_{r=0}^1 \frac{c_d \pi_{di}}{c_{di}} E [\{ P_1(X, \Omega) S_\Omega(r, g_i, X) - P_2(X, \Omega) S(r, g_i, X) \} \mid D = d] \\
&\quad - n^{-1/2} n_0 E \left[ P_1(X, \Omega) \left\{ \pi_0 \sum_{r=0}^1 S_{E,\Omega}(r, 0, X) + \pi_1 \sum_{r=0}^1 S_{E,\Omega}(r, 1, X) \right\} \mid D = 0 \right] \\
&\quad - n^{-1/2} n_1 E \left[ P_1(X, \Omega) \left\{ \pi_0 \sum_{r=0}^1 S_{E,\Omega}(r, 0, X) + \pi_1 \sum_{r=0}^1 S_{E,\Omega}(r, 1, X) \right\} \mid D = 1 \right] \\
&\quad + n^{-1/2} n_0 E \left[ P_2(X, \Omega) \left\{ \pi_0 \sum_{r=0}^1 S_E(r, 0, X) + \pi_1 \sum_{r=0}^1 S_E(r, 1, X) \right\} \mid D = 0 \right] \\
&\quad + n^{-1/2} n_1 E \left[ P_2(X, \Omega) \left\{ \pi_0 \sum_{r=0}^1 S_E(r, 0, X) + \pi_1 \sum_{r=0}^1 S_E(r, 1, X) \right\} \mid D = 1 \right] + o_p(1) \\
&= n^{-1/2} \sum_{i=1}^n \sum_{d=0}^1 \sum_{r=0}^1 \frac{c_d \pi_{di}}{c_{di}} E [\{ P_1(X, \Omega) S_\Omega(r, g_i, X) - P_2(X, \Omega) S(r, g_i, X) \} \mid D = d] \\
&\quad - n^{-1/2} n_0 E \{ P_1(X, \Omega) R_\Omega(X, \Omega) \mid D = 0 \} \\
&\quad - n^{-1/2} n_1 E \{ P_1(X, \Omega) R_\Omega(X, \Omega) \mid D = 1 \} \\
&\quad + n^{-1/2} n_0 E \{ P_2(X, \Omega) R(X, \Omega) \mid D = 0 \} \\
&\quad + n^{-1/2} n_1 E \{ P_2(X, \Omega) R(X, \Omega) \mid D = 1 \} + o_p(1).
\end{aligned}$$

However,

$$\begin{aligned}
P_1(X, \Omega) R_\Omega(X, \Omega) &= \{ R(X, \Omega) \}^{-1} R_\Omega(X, \Omega); \\
P_2(X, \Omega) R(X, \Omega) &= \{ R(X, \Omega) \}^{-1} R_\Omega(X, \Omega),
\end{aligned}$$

95 so the last 4 terms above cancel, completing the proof of Theorem 1.



## S.2. ALTERNATIVE PROOF BASED ON A HYPOTHETICAL POPULATION

Here we give an alternative argument using the hypothetical population framework of Ma (2010). Define  $\mathcal{K}_1(D, G, X, \Omega) = S_\Omega(D, G, X, \Omega)/S(D, G, X, \Omega)$  and  $\mathcal{K}_2(X, \Omega) = R_\Omega(X, \Omega)/R(X, \Omega)$ . Solving (7) in the main paper leads to the expansion

$$\begin{aligned}
\mathbf{0} &= n^{-1/2} \sum_{i=1}^n \left\{ \mathcal{K}_1(D_i, G_i, X_i, \widehat{\Omega}) - \frac{\widehat{R}_\Omega(X_i, \widehat{\Omega})}{\widehat{R}(X_i, \widehat{\Omega})} \right\} \\
&= n^{-1/2} \sum_{i=1}^n \left\{ \mathcal{K}_1(D_i, G_i, X_i, \Omega) - \frac{\widehat{R}_\Omega(X_i, \Omega)}{\widehat{R}(X_i, \Omega)} \right\} \\
&\quad + \left[ n^{-1} \sum_{i=1}^n \partial \left\{ \mathcal{K}_1(D_i, G_i, X_i, \Omega) - \frac{\widehat{R}_\Omega(X_i, \Omega)}{\widehat{R}(X_i, \Omega)} \right\} / \partial \Omega^T + o_p(1) \right] \sqrt{n}(\widehat{\Omega} - \Omega) \\
&= n^{-1/2} \sum_{i=1}^n \left[ \mathcal{K}_1(D_i, G_i, X_i, \Omega) - \mathcal{K}_2(X_i, \Omega) - \frac{\widehat{R}_\Omega(X_i, \Omega) - R_\Omega(X_i, \Omega)}{R(X_i, \Omega)} \right. \\
&\quad \left. + \frac{R_\Omega(X_i, \Omega)}{R^2(X_i, \Omega)} \left\{ \widehat{R}(X_i, \Omega) - R(X_i, \Omega) \right\} \right] + (\Gamma_1 - \Gamma_2) \sqrt{n}(\widehat{\Omega} - \Omega) + o_p(1) \\
&= n^{-1/2} \sum_{i=1}^n \left\{ \mathcal{K}_1(D_i, G_i, X_i, \Omega) - \mathcal{K}_2(X_i, \Omega) - P_1(X_i, \Omega) \widehat{R}_\Omega(X_i, \Omega) \right. \\
&\quad \left. + P_2(X_i, \Omega) \widehat{R}(X_i, \Omega) \right\} + (\Gamma_1 - \Gamma_2) \sqrt{n}(\widehat{\Omega} - \Omega) + o_p(1).
\end{aligned}$$

Now using U-statistics properties,

100

$$\begin{aligned}
&n^{-1/2} \sum_{i=1}^n \left\{ P_1(X_i, \Omega) \widehat{R}_\Omega(X_i, \Omega) - P_2(X_i, \Omega) \widehat{R}(X_i, \Omega) \right\} \\
&= \sum_{r=0}^1 \sum_{d=0}^1 n^{-3/2} \sum_{i=1}^n \sum_{j=1}^n \frac{\pi_d}{c_d} I(D_j = d) \left\{ P_1(X_i, \Omega) S_\Omega(r, G_j, X_i, \Omega) \right. \\
&\quad \left. - P_2(X_i, \Omega) S(r, G_j, X_i, \Omega) \right\} \\
&= \sum_{r=0}^1 \sum_{d=0}^1 n^{-1/2} \sum_{i=1}^n E \left[ \frac{\pi_d}{c_d} I(D = d) \left\{ P_1(x_i, \Omega) S_\Omega(r, G, x_i, \Omega) - P_2(x_i, \Omega) S(r, G, x_i, \Omega) \right\} \right] \\
&\quad + \sum_{r=0}^1 \sum_{d=0}^1 n^{-1/2} \sum_{j=1}^n E \left[ \frac{\pi_d}{c_d} I(d_j = d) \left\{ P_1(X, \Omega) S_\Omega(r, g_j, X, \Omega) - P_2(X, \Omega) S(r, g_j, X, \Omega) \right\} \right] \\
&\quad - \sum_{r=0}^1 \sum_{d=0}^1 n^{-1/2} \sum_{j=1}^n E \left[ \frac{\pi_d}{c_d} I(D_j = d) \left\{ P_1(X, \Omega) S_\Omega(r, G_j, X, \Omega) - P_2(X, \Omega) S(r, G_j, X, \Omega) \right\} \right] \\
&\quad + o_p(1).
\end{aligned}$$

Further, we thus have that

$$\begin{aligned}
&n^{-1/2} \sum_{i=1}^n \left\{ P_1(X_i, \Omega) \widehat{R}_\Omega(X_i, \Omega) - P_2(X_i, \Omega) \widehat{R}(X_i, \Omega) \right\} \\
&= \sum_{r=0}^1 \sum_{d=0}^1 n^{-1/2} \sum_{i=1}^n \pi_d \left\{ P_1(X_i, \Omega) S_{E, \Omega}(r, d, X_i, \Omega) - P_2(X_i, \Omega) S_E(r, d, X_i, \Omega) \right\} \\
&\quad + \sum_{t=0}^1 \sum_{r=0}^1 \sum_{d=0}^1 n^{-1/2} \sum_{i=1}^n \frac{\pi_d c_t}{c_d} I(d_i = d) \\
&\quad \times E \left[ \left\{ P_1(X, \Omega) S_\Omega(r, g_i, X, \Omega) - P_2(X, \Omega) S(r, g_i, X, \Omega) \right\} \mid D = t \right] \\
&\quad - \sum_{t=0}^1 \sum_{r=0}^1 \sum_{d=0}^1 n^{1/2} \pi_d c_t E \left\{ P_1(X, \Omega) S_{E, \Omega}(r, d, X, \Omega) - P_2(X, \Omega) S_E(r, d, X, \Omega) \mid D = t \right\} \\
&\quad + o_p(1).
\end{aligned}$$

Thus,

$$\begin{aligned}
& n^{-1/2} \sum_{i=1}^n \left\{ P_1(X_i, \Omega) \widehat{R}_\Omega(X_i, \Omega) - P_2(X_i, \Omega) \widehat{R}(X_i, \Omega) \right\} \\
&= \sum_{r=0}^1 \sum_{d=0}^1 n^{-1/2} \sum_{i=1}^n \pi_d \{ P_1(X_i, \Omega) S_{E, \Omega}(r, d, X_i, \Omega) - P_2(X_i, \Omega) S_E(r, d, X_i, \Omega) \} \\
&\quad + \sum_{d=0}^1 \sum_{r=0}^1 n^{-1/2} \sum_{i=1}^n \frac{\pi_{d_i} c_d}{c_{d_i}} E [\{ P_1(X, \Omega) S_\Omega(r, g_i, X, \Omega) - P_2(X, \Omega) S(r, g_i, X, \Omega) \} \mid D = d] \\
&\quad - \sum_{t=0}^1 \sum_{r=0}^1 \sum_{d=0}^1 n^{1/2} \pi_d c_t E \{ P_1(X, \Omega) S_{E, \Omega}(r, d, X, \Omega) - P_2(X, \Omega) S_E(r, d, X, \Omega) \mid D = t \} \\
&\quad + o_p(1) \\
&= \sum_{d=0}^1 \sum_{r=0}^1 n^{-1/2} \sum_{i=1}^n \frac{\pi_{d_i} c_d}{c_{d_i}} E [\{ P_1(X, \Omega) S_\Omega(r, g_i, X, \Omega) - P_2(X, \Omega) S(r, g_i, X, \Omega) \} \mid D = d] \\
&\quad + o_p(1).
\end{aligned}$$

Here the last step is because for any  $X$ ,

$$\begin{aligned}
& \sum_{r=0}^1 \sum_{d=0}^1 \pi_d \{ P_1(X, \Omega) S_{E, \Omega}(r, d, X, \Omega) - P_2(X, \Omega) S_E(r, d, X, \Omega) \} \\
&= \frac{1}{R(X, \Omega)} \sum_{r=0}^1 \sum_{d=0}^1 \pi_d S_{E, \Omega}(r, d, X, \Omega) - \frac{R_\Omega(X, \Omega)}{R^2(X, \Omega)} \sum_{r=0}^1 \sum_{d=0}^1 \pi_d S_E(r, d, X, \Omega) \\
&= \frac{R_\Omega(X, \Omega)}{R(X, \Omega)} - \frac{R(X, \Omega) R_\Omega(X, \Omega)}{R^2(X, \Omega)} \\
&= \mathbf{0}.
\end{aligned}$$

This leads to the result.

## S.3. SCORE AND HESSIAN: RARE DISEASE CASE OF §2.2 IN THE MAIN PAPER

105

We consider models in which  $\kappa + m(g, x, \beta) = Q^T(g, x)\Omega$ , and  $\Omega = (\kappa, \beta^T)^T$ . The point of this section is to show that both the log-pseudolikelihood score and its Hessian are very simply calculated, and that the Hessian is negative semidefinite.

In the rare disease case,

$$S(d, g, x, \Omega) = \exp\{dQ^T(g, x)\Omega\}, \quad (16)$$

and thus

$$\log\{S(d, g, x, \Omega)\} = dQ^T(g, x)\Omega.$$

110

This means that

$$\partial \log\{S(d, g, x, \Omega)\} / \partial \Omega = dQ(g, x),$$

and also that

$$\partial^2 \log\{S(d, g, x, \Omega)\} \partial \Omega \partial \Omega^T = 0.$$

Similarly, in the rare disease case,

$$\widehat{R}(X, \Omega) = n_0^{-1} \sum_{j=1}^n \sum_{r=0}^1 I(D_j = r) S(r, G_j, X, \Omega).$$

From (16),

$$\begin{aligned} \widehat{R}_\Omega(X, \Omega) &= \partial \widehat{R}(X, \Omega) / \partial \Omega = n_0^{-1} \sum_{j=1}^n \sum_{r=0}^1 I(D_j = r) S(r, G_j, X, \Omega) r Q(G_j, X) \\ &= n_0^{-1} \sum_{j=1}^n I(D_j = 0) S(1, G_j, X, \Omega) Q(G_j, X). \end{aligned} \quad (17)$$

Thus,

115

$$\begin{aligned} \widehat{R}_{\Omega\Omega}(X, \Omega) &= \partial^2 \widehat{R}(X, \Omega) / \partial \Omega \partial \Omega^T \\ &= n_0^{-1} \sum_{j=1}^n I(D_j = 0) S(1, G_j, X, \Omega) Q(G_j, X) Q^T(G_j, X). \end{aligned} \quad (18)$$

This means that the Hessian for the log-pseudolikelihood in equation (6) of the main paper is

$$\begin{aligned} -\frac{\partial \{\widehat{R}_\Omega(X, \Omega) / \widehat{R}(X, \Omega)\}}{\partial \Omega^T} &= -\frac{\widehat{R}_{\Omega\Omega}(X, \Omega)}{\widehat{R}(X, \Omega)} + \frac{\widehat{R}_\Omega(X, \Omega) \widehat{R}_\Omega^T(X, \Omega)}{\widehat{R}^2(X, \Omega)} \\ &= \{\widehat{R}(X, \Omega)\}^{-2} \left\{ -\widehat{R}_{\Omega\Omega}(X, \Omega) \widehat{R}(X, \Omega) + \widehat{R}_\Omega(X, \Omega) \widehat{R}_\Omega^T(X, \Omega) \right\}. \end{aligned}$$

Write  $V_j = I(D_j = 0) S(1, G_j, X, \Omega)$ . For matrices, define  $A \leq B$  to be that  $B - A$  is positive semidefinite. By Hölder's inequality

$$\begin{aligned} \widehat{R}_\Omega(X, \Omega) \widehat{R}_\Omega^T(X, \Omega) &= n_0^{-1} \sum_{j=1}^n V_j Q(G_j, X) \times n_0^{-1} \sum_{j=1}^n V_j Q^T(G_j, X) \\ &\leq n_0^{-1} \sum_{j=1}^n V_j Q(G_j, X) Q^T(G_j, X) \times n_0^{-1} \sum_{j=1}^n V_j \\ &= \widehat{R}_{\Omega\Omega}(X, \Omega) \widehat{R}(X, \Omega). \end{aligned}$$

Hence, the Hessian is negative semidefinite as claimed.

## S.4. STRATIFICATION AND THE INDEPENDENCE ASSUMPTION

The assumption of gene-environment independence may not hold when there may exist underlying strata in the population, e.g. defined by ethnicity, across which the distribution of both genetic and environmental factors vary. In this case, as discussed in Section 3.1 of Chatterjee & Carroll (2005), we extend our framework to account for the scenario where the genetic and environmental factors can be assumed to be independent conditional on a discrete stratification  $\mathcal{A}$  with  $a = 1, \dots, A$  levels.

To apply the method in Section 2.1 in the main paper to this case, for stratum  $a$ , we replace  $\pi_d$  by  $\pi_{da}$ , the probability that  $D = d$  in the  $a^{\text{th}}$  stratum of the source population, and we replace  $n, n_0$  and  $n_1$  by  $n_a, n_{0a}$  and  $n_{1a}$ , the number of subjects, controls, and cases in stratum  $a$ , respectively. We modify (1) to  $\text{pr}(D = 1|G, X, \mathcal{A} = a) = H\{\alpha_{0a} + m(G, X, \beta)\}$ : more complex models with possible interactions between  $(G, X)$  and the strata can also be considered. We then set  $\kappa_a = \alpha_{0a} + \log(n_{1a}/n_{0a}) - \log(\pi_{1a}/\pi_{0a})$ . The parameters to be estimated are then  $\Omega = (\kappa_1, \dots, \kappa_A, \beta^T)^T$ . We also replace  $S(d, g, x, \Omega)$  by

$$S_a(d, g, x, \Omega) = \frac{\exp[d\{\kappa_a + m(g, x, \beta)\}]}{1 + \exp\{\kappa_a + \log(\pi_{1a}/\pi_{0a}) - \log(n_{1a}/n_{0a}) + m(g, x, \beta)\}}.$$

Next, set  $n = \sum_{a=1}^A n_a$ , and replace (5) by

$$\widehat{R}_a(x, \Omega) = \sum_{j=1}^n \sum_{r=0}^1 \sum_{d=0}^1 (\pi_{da}/n_{da}) I(D_j = d, \mathcal{A}_j = a) S_a(r, G_j, x, \Omega),$$

and the estimated loglikelihood (6) becomes

$$\mathcal{L}(\Omega) = \sum_{a=1}^A I(\mathcal{A}_i = a) [\sum_{i=1}^n \log\{S_a(D_i, G_i, X_i, \Omega)\} - \sum_{i=1}^n \log\{\widehat{R}_a(X_i, \Omega)\}],$$

which is then maximized to obtain the estimate  $\widehat{\Omega}$ . Now replace the score function (7) by

$$\widehat{S}_n(\Omega) = n^{-1/2} \sum_{a=1}^A \sum_{i=1}^n I(\mathcal{A}_i = a) \left\{ \frac{S_{\Omega,a}(D_i, G_i, X_i, \Omega)}{S_a(D_i, G_i, X_i, \Omega)} - \frac{\widehat{R}_{\Omega,a}(X_i, \Omega)}{\widehat{R}_a(X_i, \Omega)} \right\},$$

using the obvious definitions of  $S_{\Omega,a}(\cdot)$ ,  $\widehat{R}_{\Omega,a}(\cdot)$ ,  $P_{1a}(X, \Omega)$ ,  $P_{2a}(X, \Omega)$  and with  $Z_i = (D_i, G_i, X_i, \mathcal{A}_i)$ .

In terms of the asymptotic theory of Section 2.3 of the main paper, we replace  $(\Gamma_1, \Gamma_2)$  by

$$\Gamma_1 = \sum_{a=1}^A \sum_{d=0}^1 (n_{da}/n) E \left\{ \frac{\partial S_{\Omega,a}(D, G, X, \Omega)/S_a(D, G, X, \Omega)}{\partial \Omega^T} \Big| \mathcal{A} = a, D = d \right\};$$

$$\Gamma_2 = \sum_{a=1}^A \sum_{d=0}^1 (n_{da}/n) E \left\{ \frac{\partial R_{\Omega,a}(X, \Omega)/R_a(X, \Omega)}{\partial \Omega^T} \Big| \mathcal{A} = a, D = d \right\}.$$

Then define

$$\zeta_a(Z_i, \Omega) = I(\mathcal{A}_i = a) \frac{S_{\Omega,a}(Z_i, \Omega)}{S_a(Z_i, \Omega)} - \frac{R_{\Omega,a}(X_i, \Omega)}{R_a(X_i, \Omega)}$$

$$- \sum_{d=0}^1 \sum_{r=0}^1 \frac{c_{d,a} \pi_{d_i,a}}{c_{d_i,a}} \times E [\{P_{1a}(X, \Omega) S_{\Omega,a}(r, g_i, X) - P_{2a}(X, \Omega) S_a(r, g_i, X)\} | \mathcal{A} = a, D = d],$$

and now  $\Sigma$  becomes

$$\Sigma = \sum_{a=1}^A \sum_{d=0}^1 (n_{da}/n) \text{cov}\{\zeta_a(D, X, G, \Omega) | D = d, \mathcal{A} = a\}.$$

## S·5. ADDITIONAL SIMULATIONS

S·5.1. *Comparison with the Method of Chatterjee & Carroll (2005)*

Table 2 of this Supplementary Material gives results in the same simulation setting as in Section 3 in the main paper, except that to compare with Chatterjee & Carroll (2005), we only use the first SNP for our method and for the Chatterjee-Carroll method. The latter method uses the R package CGEN in Bioconductor, and is based on that package’s function *snp.logistic*, which allows for SNP levels 0, 1, 2 and  $X$  values 0,1, as in our simulation. The results of that analysis and our method are very similar, indicating that our method is, in this case, almost efficient.

S·5.2. *Misspecification of Population Disease Rate*

Table 3 of this Supplementary Material reports the results of a simulation to evaluate the robustness of our method to misspecification of the population disease rate, using a sample of 1000 cases and 1000 controls. We considered actual disease rates of  $\pi_1 = 0.03, 0.05, 0.085$  and  $0.12$ , and compared the results for the rare disease approximation and when the assumed disease rate was  $\pi_1 = 0.03$ . For the method using the a rare disease approximation, it was only when the rate was  $\pi_1 = 0.12$  that there was a deterioration in the coverage probabilities, but even then the lowest coverage rate was 91.8%. When the disease rate was assumed to be  $\pi_1 = 0.03$ , nominal coverage was seen except when the exact disease rate was  $\pi_1 = 0.12$ , and even at the worst case the lowest coverage rate was 93.1%, almost nominal. This indicates a surprising robustness to disease rate misspecification.

S·5.3. *Violations of the Gene-Environment Independence Assumption*

Tables S.4, S.5 and S.6 of this Supplementary Material contain simulations to examine the robustness of our method to violations of the gene-environment independence assumption. In these simulations, the genetic variables are generated as described in Section 3 of the main paper, but the environmental variable is normally distributed with mean  $\alpha G_1, \alpha G_2$ , or  $\alpha G_3$ . We let  $\alpha = 0.032$  to introduce a dependence between  $X$  and  $G$  with  $R^2 = 0.001$ . Here  $\beta_G = \{\log(1.2), \log(1.2), 0, \log(1.2), 0\}$  as in Section 3 of the main paper, but  $\beta_X = \log(1.73)$  and  $\beta_{GX} = \{\log(1.42), 0, 0, \log(1.42), 0\}$ . In each simulation, the logistic intercept was chosen to give a 3% population disease prevalence. In Table S.4  $X$  is correlated with  $G_1$ , which has a nonzero main effect and a nonzero interaction; in Table S.5  $X$  is correlated with  $G_2$ , which has a nonzero main effect but no interaction effect; in Table S.6  $X$  is correlated with  $G_3$ , which has neither main nor interaction effects.

Similarly to Chatterjee & Carroll (2005), we find that violating the G-E independence assumption induces a bias in the parameter estimates. In Section S·4 of this Supplementary Material we describe how to remove this bias when G and E are independent conditional on a discrete stratification variable  $\mathcal{A}$ . Mukherjee & Chatterjee (2008) and Chen et al. (2009) show how to use empirical-Bayes methods as well to provide additional robustness against violations of the gene-environment independence assumption.

S·6. PROPERTIES OF  $\widehat{R}(x, \Omega)$  IN EQUATION (5) OF THE MAIN PAPER

180 Equation (5) of the main paper is

$$\widehat{R}(x, \Omega) = \sum_{j=1}^n \sum_{r=0}^1 \sum_{d=0}^1 (\pi_d/n_d) I(D_j = d) S(r, G_j, x, \Omega).$$

Computing its expectation is facilitated by seeing that

$$E\{I(D_j = d)S(r, G_j, x, \Omega)\} = E\{S(r, G_j, x, \Omega)|D_j = d\} = E\{S(r, G, x, \Omega)|D = d\}$$

Hence, recognizing that there are  $n_d$  subjects with  $D = d$ ,

$$\begin{aligned} E\{\widehat{R}(x, \Omega)\} &= \sum_{j=1}^n \sum_{r=0}^1 \sum_{d=0}^1 (\pi_d/n_d) E\{S(r, G, x, \Omega)|D = d\} \\ &= \sum_{r=0}^1 \sum_{d=0}^1 \pi_d/n_d E\{S(r, G, x, \Omega)|D = d\} \\ &= R(x, \Omega). \end{aligned}$$

Hence, (5) of the main paper is unbiased for  $R(x, \Omega)$ . Further, we see that

$$\begin{aligned} &\widehat{R}(x, \Omega) - R(x, \Omega) \\ &= \sum_{r=0}^1 \sum_{d=0}^1 (\pi_d/n_d) \sum_{j=1}^n \\ &\quad \times [I(D_j = d)S(r, G_j, x, \Omega) - E\{I(D_j = d)S(r, G_j, x, \Omega)\}], \end{aligned}$$

so that  $\widehat{R}(x, \Omega)$  is  $n^{1/2}$ -consistent for  $R(x, \Omega)$ , and with proper normalization is asymptotically normally distributed.

185

## S-7. SNPs INVOLVED IN CREATING THE POLYGENIC RISK SCORE

Table S.1. *SNPs involved in creating the polygenic risk score, and their regression coefficients*

| Actual RS<br>Number | Variable<br>Name | Coefficient |
|---------------------|------------------|-------------|
| rs11249433          | gene1            | -0.02813492 |
| rs1045485           | gene2            | -0.09307971 |
| rs13387042          | gene3            | -0.26203658 |
| rs4973768           | gene4            | 0.08013260  |
| rs10069690          | gene5            | 0.06459363  |
| rs10941679          | gene6            | 0.09185539  |
| rs889312            | gene7            | -0.00565121 |
| rs17530068          | gene8            | 0.09668742  |
| rs2046210           | gene9            | 0.09851217  |
| rs1562430           | gene10           | -0.14871719 |
| rs1011970           | gene11           | 0.05329783  |
| rs865686            | gene12           | -0.02913340 |
| rs2380205           | gene13           | -0.01821032 |
| rs10995190          | gene14           | -0.04275836 |
| rs2981582           | gene15           | 0.14008397  |
| rs909116            | gene16           | 0.04955235  |
| rs614367            | gene17           | 0.06438418  |
| rs3803662           | gene18           | 0.27080105  |
| rs6504950           | gene19           | -0.17586244 |
| rs8170              | gene20           | 0.08570773  |
| rs999737_as         | gene21           | -0.13737833 |

S-8. COMPARISON WITH THE METHOD OF CHATTERJEE & CARROLL (2005) IN A SPECIAL CASE

Table S.2. Results of 1000 simulations with 3% disease prevalence as described in Section 3 of the main paper, except that to compare with Chatterjee & Carroll (2005), we only use the first SNP. We compare our semiparametric pseudolikelihood estimator to the method of Chatterjee & Carroll (2005) and to ordinary logistic regression. The simulations were performed with 500 cases and 500 controls

|         | 500 cases & 500 controls |           |               | 1000 cases & 1000 controls |           |               |
|---------|--------------------------|-----------|---------------|----------------------------|-----------|---------------|
| True    | $\beta_{G1}$             | $\beta_X$ | $\beta_{G1X}$ | $\beta_{G1}$               | $\beta_X$ | $\beta_{G1X}$ |
|         | 0.182                    | 0.405     | 0.262         | 0.182                      | 0.405     | 0.262         |
|         | Logistic                 |           |               |                            |           |               |
| Bias    | -0.011                   | 0.001     | 0.015         | 0.009                      | 0.003     | -0.001        |
| CI (%)  | 93.9                     | 94.1      | 93.7          | 95.2                       | 94.2      | 95.6          |
|         | Chatterjee Carroll       |           |               |                            |           |               |
| Bias    | -0.008                   | 0.005     | -0.004        | 0.013                      | 0.006     | -0.016        |
| CI (%)  | 95.1                     | 94.1      | 93.6          | 96.0                       | 94.6      | 94.4          |
| MSE Eff | 1.405                    | 1.108     | 2.227         | 1.321                      | 1.118     | 2.183         |
|         | SPMLE, Rare              |           |               |                            |           |               |
| Bias    | -0.007                   | 0.004     | -0.001        | 0.013                      | 0.006     | -0.015        |
| CI (%)  | 95.1                     | 94.1      | 94.1          | 95.8                       | 94.5      | 94.8          |
| MSE Eff | 1.381                    | 1.104     | 2.166         | 1.290                      | 1.113     | 2.141         |
|         | SPMLE, $\pi_1$ known     |           |               |                            |           |               |
| Bias    | -0.014                   | 0.001     | 0.014         | 0.006                      | 0.003     | 0.000         |
| CI (%)  | 95.1                     | 94.2      | 94.8          | 95.9                       | 94.7      | 94.4          |
| MSE Eff | 1.359                    | 1.100     | 2.016         | 1.292                      | 1.113     | 2.021         |

*Logistic* is ordinary logistic regression; *Chatterjee Carroll* is the method of Chatterjee & Carroll (2005); *SPMLE, Rare* is our estimator using the rare disease approximation with unknown  $\pi_1$  (Section 2.2 of the main paper); *SPMLE,  $\pi_1$  known* is our estimator when  $\pi_1$  is known in the source population (Section 2.1 of the main paper); *Bias* is the mean bias; *CI (%)* is the coverage in percent of a nominal 95% confidence interval (calculated using the asymptotic standard error); *MSE Eff* is the mean squared error efficiency of the method compared to logistic regression.



## S.9. SIMULATION WHEN THE DISEASE RATE IS MISSPECIFIED

Table S.3. Results of 1000 simulations as described in §3 of the main paper, except that the logistic intercept has been modified to give population disease rates (0.03, 0.05, 0.085, 0.12). We compare ordinary logistic regression, our method using the rare disease approximation, and our method with “known”  $\pi_1 = 0.03$ , which is misspecified when  $\pi_1 > 0.03$ . The simulations were performed with 1000 cases and 1000 controls

| True                  | $\beta_{G1}$ | $\beta_{G2}$ | $\beta_{G3}$ | $\beta_{G4}$ | $\beta_{G5}$ | $\beta_X$ | $\beta_{G1X}$ | $\beta_{G2X}$   | $\beta_{G3X}$ | $\beta_{G4X}$ | $\beta_{G5X}$ |
|-----------------------|--------------|--------------|--------------|--------------|--------------|-----------|---------------|-----------------|---------------|---------------|---------------|
|                       | 0.18         | 0.18         | 0.00         | 0.18         | 0.00         | 0.41      | 0.26          | 0.00            | 0.00          | 0.26          | 0.00          |
| Logistic              |              |              |              |              |              |           |               |                 |               |               |               |
| Disease Rate = 0.03   |              |              |              |              |              |           |               |                 |               |               |               |
| Bias                  | 0.00         | 0.01         | 0.00         | 0.01         | -0.01        | 0.01      | 0.01          | -0.01           | 0.00          | 0.00          | 0.01          |
| CI (%)                | 94.3         | 95.2         | 95.7         | 95.1         | 94.7         | 94.6      | 94.9          | 94.2            | 94.5          | 96.0          | 94.2          |
| Disease Rate = 0.05   |              |              |              |              |              |           |               |                 |               |               |               |
| Bias                  | 0.00         | 0.00         | 0.00         | 0.00         | -0.01        | 0.00      | 0.00          | 0.00            | 0.00          | 0.00          | 0.01          |
| CI (%)                | 95.8         | 95.2         | 95.9         | 94.7         | 94.4         | 95.6      | 95.7          | 95.5            | 95.3          | 94.8          | 95.3          |
| Disease Rate = 0.085  |              |              |              |              |              |           |               |                 |               |               |               |
| Bias                  | -0.01        | 0.01         | 0.00         | 0.00         | 0.00         | 0.00      | 0.01          | 0.00            | 0.00          | 0.00          | 0.01          |
| CI (%)                | 94.2         | 94.8         | 95.6         | 94.4         | 93.7         | 94.4      | 94.9          | 94.3            | 94.9          | 95.9          | 94.2          |
| Disease Rate = 0.12   |              |              |              |              |              |           |               |                 |               |               |               |
| Bias                  | 0.00         | 0.01         | -0.01        | 0.00         | 0.00         | 0.00      | 0.00          | 0.00            | 0.00          | 0.00          | 0.01          |
| CI (%)                | 94.8         | 95.5         | 94.9         | 95.2         | 93.8         | 95.7      | 94.4          | 95.9            | 94.9          | 95.3          | 95.0          |
| SPMLE, Rare           |              |              |              |              |              |           |               |                 |               |               |               |
| Disease Rate = 0.03   |              |              |              |              |              |           |               |                 |               |               |               |
| Bias                  | 0.01         | 0.00         | 0.00         | 0.02         | -0.01        | 0.02      | -0.02         | -0.01           | 0.01          | -0.02         | 0.01          |
| CI (%)                | 95.2         | 95.4         | 96.4         | 95.8         | 95.3         | 95.1      | 95.4          | 94.8            | 96.1          | 95.5          | 94.9          |
| MSE Eff               |              | All G: 1.28  |              |              |              | X: 1.26   |               | All G * X: 2.18 |               |               |               |
| Disease Rate = 0.05   |              |              |              |              |              |           |               |                 |               |               |               |
| Bias                  | 0.02         | 0.00         | 0.00         | 0.02         | -0.01        | 0.03      | -0.04         | 0.00            | 0.00          | -0.03         | 0.00          |
| CI (%)                | 94.4         | 95.4         | 96.8         | 94.4         | 95.0         | 95.1      | 93.8          | 94.6            | 96.3          | 94.5          | 94.4          |
| MSE Eff               |              | All G: 1.25  |              |              |              | X: 1.23   |               | All G * X: 1.99 |               |               |               |
| Disease Rate = 0.085  |              |              |              |              |              |           |               |                 |               |               |               |
| Bias                  | 0.02         | 0.01         | 0.00         | 0.02         | 0.00         | 0.05      | -0.05         | -0.01           | 0.00          | -0.05         | 0.00          |
| CI (%)                | 95.0         | 94.5         | 96.1         | 94.1         | 93.9         | 93.5      | 93.9          | 94.8            | 95.8          | 94.5          | 95.6          |
| MSE Eff               |              | All G: 1.25  |              |              |              | X: 1.14   |               | All G * X: 2.02 |               |               |               |
| Disease Rate = 0.12   |              |              |              |              |              |           |               |                 |               |               |               |
| Bias                  | 0.03         | 0.01         | -0.01        | 0.03         | 0.00         | 0.06      | -0.08         | -0.01           | 0.00          | -0.06         | 0.00          |
| CI (%)                | 94.2         | 95.5         | 94.6         | 93.3         | 93.9         | 93.4      | 92.0          | 96.1            | 94.5          | 91.8          | 94.4          |
| MSE Eff               |              | All G: 1.21  |              |              |              | X: 1.02   |               | All G * X: 1.88 |               |               |               |
| SPMLE, $\pi_1 = 0.03$ |              |              |              |              |              |           |               |                 |               |               |               |
| Disease Rate = 0.03   |              |              |              |              |              |           |               |                 |               |               |               |
| Bias                  | 0.00         | 0.00         | 0.00         | 0.01         | -0.01        | 0.01      | 0.00          | -0.01           | 0.01          | -0.01         | 0.01          |
| CI (%)                | 95.1         | 95.5         | 96.4         | 95.8         | 95.0         | 95.5      | 95.6          | 94.6            | 95.9          | 95.2          | 94.5          |
| MSE Eff               |              | All G: 1.28  |              |              |              | X: 1.28   |               | All G * X: 2.07 |               |               |               |
| Disease Rate = 0.05   |              |              |              |              |              |           |               |                 |               |               |               |
| Bias                  | 0.01         | 0.00         | 0.00         | 0.01         | -0.01        | 0.01      | -0.01         | 0.00            | 0.00          | -0.01         | 0.01          |
| CI (%)                | 94.6         | 95.4         | 96.4         | 94.7         | 94.7         | 95.8      | 94.3          | 94.6            | 96.0          | 94.5          | 94.1          |
| MSE Eff               |              | All G: 1.25  |              |              |              | X: 1.27   |               | All G * X: 1.90 |               |               |               |
| Disease Rate = 0.085  |              |              |              |              |              |           |               |                 |               |               |               |
| Bias                  | 0.01         | 0.01         | 0.00         | 0.01         | 0.00         | 0.03      | -0.03         | -0.01           | 0.00          | -0.03         | 0.00          |
| CI (%)                | 95.1         | 94.8         | 96.4         | 94.4         | 93.9         | 94.7      | 94.9          | 95.1            | 95.8          | 94.9          | 95.2          |
| MSE Eff               |              | All G: 1.25  |              |              |              | X: 1.21   |               | All G * X: 1.95 |               |               |               |
| Disease Rate = 0.12   |              |              |              |              |              |           |               |                 |               |               |               |
| Bias                  | 0.02         | 0.01         | -0.01        | 0.03         | 0.00         | 0.05      | -0.06         | -0.01           | 0.00          | -0.05         | 0.01          |
| CI (%)                | 94.3         | 95.6         | 94.9         | 93.6         | 93.8         | 94.4      | 93.5          | 96.3            | 94.6          | 93.1          | 94.6          |
| MSE Eff               |              | All G: 1.22  |              |              |              | X: 1.10   |               | All G * X: 1.84 |               |               |               |

*Logistic* is ordinary logistic regression; *SPMLE, Rare* is our estimator using the rare disease approximation with unknown  $\pi_1$  (Section 2.2 of the main paper); *SPMLE,  $\pi_1 = 0.03$*  is our estimator calculated as if the disease rate in the source population were known to be 0.03 (Section 2.1 of the main paper); *Bias* is the mean bias; *CI (%)* is the coverage in percent of a nominal 95% confidence interval (calculated using the asymptotic standard error); *MSE Eff* is the mean squared error efficiency of our method compared to logistic regression, averaged over  $G$ , over  $X$  and over the  $G * X$  interactions.

S-10. SIMULATIONS WHEN THE GENE-ENVIRONMENT INDEPENDENCE ASSUMPTION IS VIOLATED 190

Table S.4. Results of 1000 simulations with  $G$  as described in Section 3 of the main paper, but  $X \sim \mathbf{N}(0.032G_1, 1)$ . We compare our semiparametric pseudolikelihood estimator to ordinary logistic regression. Three simulations were performed with sample sizes of (1000, 2000, 3000) cases and controls each

|                                  | $\beta_{G1}$   | $\beta_{G2}$ | $\beta_{G3}$ | $\beta_{G4}$ | $\beta_{G5}$ | $\beta_X$ | $\beta_{G1X}$ | $\beta_{G2X}$      | $\beta_{G3X}$ | $\beta_{G4X}$ | $\beta_{G5X}$ |
|----------------------------------|----------------|--------------|--------------|--------------|--------------|-----------|---------------|--------------------|---------------|---------------|---------------|
| True                             | 0.18           | 0.18         | 0.00         | 0.18         | 0.00         | 0.55      | 0.35          | 0.00               | 0.00          | 0.35          | 0.00          |
| Logistic: 1000 cases             |                |              |              |              |              |           |               |                    |               |               |               |
| Bias                             | -0.01          | 0.00         | 0.01         | 0.00         | -0.01        | 0.01      | 0.01          | 0.01               | -0.01         | 0.01          | 0.01          |
| CI (%)                           | 94.5           | 96.2         | 95.8         | 94.8         | 93.7         | 94.0      | 95.4          | 95.7               | 95.6          | 95.5          | 95.3          |
| Logistic: 2000 cases             |                |              |              |              |              |           |               |                    |               |               |               |
| Bias                             | 0.00           | 0.00         | 0.00         | 0.00         | 0.00         | 0.00      | 0.00          | 0.00               | 0.00          | 0.00          | 0.00          |
| CI (%)                           | 95.4           | 94.7         | 94.8         | 95.2         | 95.0         | 94.5      | 95.6          | 96.1               | 94.0          | 94.7          | 95.9          |
| Logistic: 3000 cases             |                |              |              |              |              |           |               |                    |               |               |               |
| Bias                             | 0.00           | 0.00         | 0.00         | 0.00         | 0.00         | 0.00      | 0.00          | 0.00               | 0.00          | 0.00          | 0.00          |
| CI (%)                           | 94.1           | 94.1         | 95.1         | 95.7         | 94.6         | 94.2      | 94.2          | 95.4               | 94.8          | 95.0          | 94.7          |
| SPMLE, $\pi_1$ known: 1000 cases |                |              |              |              |              |           |               |                    |               |               |               |
| Bias                             | -0.01          | 0.00         | 0.01         | 0.00         | -0.01        | -0.03     | 0.10          | 0.00               | 0.00          | 0.01          | 0.00          |
| CI (%)                           | 94.2           | 95.9         | 95.0         | 95.2         | 93.8         | 93.3      | 80.4          | 94.9               | 94.9          | 95.0          | 94.8          |
| MSE Eff                          | All $G$ : 1.07 |              |              |              | $X$ : 1.31   |           |               | All $G * X$ : 1.75 |               |               |               |
| SPMLE, $\pi_1$ known: 2000 cases |                |              |              |              |              |           |               |                    |               |               |               |
| Bias                             | 0.00           | 0.00         | 0.00         | 0.01         | 0.00         | -0.03     | 0.10          | 0.00               | 0.00          | 0.00          | 0.00          |
| CI (%)                           | 94.2           | 94.8         | 95.1         | 95.5         | 95.6         | 90.9      | 71.4          | 95.5               | 94.1          | 95.0          | 95.6          |
| MSE Eff                          | All $G$ : 1.07 |              |              |              | $X$ : 1.08   |           |               | All $G * X$ : 1.53 |               |               |               |
| SPMLE, $\pi_1$ known: 3000 cases |                |              |              |              |              |           |               |                    |               |               |               |
| Bias                             | -0.01          | 0.00         | 0.00         | 0.00         | 0.00         | -0.03     | 0.10          | 0.00               | 0.00          | 0.00          | 0.00          |
| CI (%)                           | 94.7           | 95.3         | 95.7         | 95.2         | 94.2         | 88.0      | 54.8          | 94.2               | 95.7          | 95.0          | 93.9          |
| MSE Eff                          | All $G$ : 1.06 |              |              |              | $X$ : 0.95   |           |               | All $G * X$ : 1.27 |               |               |               |

*Logistic* is ordinary logistic regression; *SPMLE,  $\pi_1$  known* is our estimator when  $\pi_1$  is known in the source population (Section 2.1 of the main paper); *Bias* is the mean bias; *CI (%)* is the coverage in percent of a nominal 95% confidence interval (calculated using the asymptotic standard error); *MSE Eff* is the mean squared error efficiency of our method compared to logistic regression, averaged over  $G$ , over  $X$  and over the  $G * X$  interactions.

Table S.5. Results of 1000 simulations with  $G$  as described in Section 3 of the main paper, but  $X \sim \mathbf{N}(0.032G_2, 1)$ . We compare our semiparametric pseudolikelihood estimator to ordinary logistic regression. Three simulations were performed with sample sizes of (1000, 2000, 3000) cases and controls each

|                                  | $\beta_{G1}$   | $\beta_{G2}$ | $\beta_{G3}$ | $\beta_{G4}$ | $\beta_{G5}$ | $\beta_X$ | $\beta_{G1X}$      | $\beta_{G2X}$ | $\beta_{G3X}$ | $\beta_{G4X}$ | $\beta_{G5X}$ |
|----------------------------------|----------------|--------------|--------------|--------------|--------------|-----------|--------------------|---------------|---------------|---------------|---------------|
| True                             | 0.18           | 0.18         | 0.00         | 0.18         | 0.00         | 0.55      | 0.35               | 0.00          | 0.00          | 0.35          | 0.00          |
| Logistic: 1000 cases             |                |              |              |              |              |           |                    |               |               |               |               |
| Bias                             | 0.00           | 0.00         | 0.00         | 0.00         | 0.00         | 0.01      | 0.01               | 0.00          | 0.00          | 0.00          | 0.00          |
| CI (%)                           | 93.4           | 95.1         | 94.5         | 93.0         | 95.7         | 94.4      | 94.4               | 93.7          | 94.8          | 93.4          | 94.4          |
| Logistic: 2000 cases             |                |              |              |              |              |           |                    |               |               |               |               |
| Bias                             | 0.00           | -0.01        | 0.00         | 0.00         | 0.00         | 0.00      | 0.01               | 0.01          | 0.00          | 0.00          | 0.00          |
| CI (%)                           | 95.3           | 94.0         | 94.4         | 94.6         | 93.2         | 94.9      | 94.6               | 94.8          | 94.2          | 95.5          | 93.8          |
| Logistic: 3000 cases             |                |              |              |              |              |           |                    |               |               |               |               |
| Bias                             | 0.00           | 0.00         | 0.00         | 0.00         | 0.00         | 0.00      | 0.00               | 0.00          | 0.00          | 0.00          | 0.00          |
| CI (%)                           | 94.1           | 94.5         | 94.5         | 95.3         | 95.2         | 95.9      | 94.7               | 93.9          | 94.4          | 95.6          | 95.3          |
| SPMLE, $\pi_1$ known: 1000 cases |                |              |              |              |              |           |                    |               |               |               |               |
| Bias                             | 0.00           | -0.01        | 0.00         | 0.01         | -0.01        | -0.04     | 0.01               | 0.06          | 0.00          | 0.00          | 0.00          |
| CI (%)                           | 93.7           | 95.3         | 95.4         | 94.0         | 95.1         | 89.4      | 93.8               | 86.0          | 95.0          | 94.6          | 94.9          |
| MSE Eff                          | All $G$ : 1.06 |              |              | X: 1.12      |              |           | All $G * X$ : 2.19 |               |               |               |               |
| SPMLE, $\pi_1$ known: 2000 cases |                |              |              |              |              |           |                    |               |               |               |               |
| Bias                             | 0.00           | -0.01        | 0.00         | 0.00         | 0.00         | -0.04     | 0.01               | 0.06          | 0.00          | 0.00          | 0.00          |
| CI (%)                           | 95.6           | 94.2         | 94.9         | 94.4         | 93.9         | 88.1      | 94.3               | 78.7          | 95.1          | 95.4          | 95.6          |
| MSE Eff                          | All $G$ : 1.08 |              |              | X: 0.91      |              |           | All $G * X$ : 1.91 |               |               |               |               |
| SPMLE, $\pi_1$ known: 3000 cases |                |              |              |              |              |           |                    |               |               |               |               |
| Bias                             | 0.00           | 0.00         | 0.00         | 0.00         | 0.00         | -0.04     | 0.01               | 0.06          | 0.00          | 0.00          | 0.00          |
| CI (%)                           | 94.8           | 94.2         | 94.9         | 95.9         | 94.9         | 84.3      | 95.4               | 72.7          | 95.4          | 95.3          | 95.5          |
| MSE Eff                          | All $G$ : 1.08 |              |              | X: 0.72      |              |           | All $G * X$ : 1.82 |               |               |               |               |

*Logistic* is ordinary logistic regression; *SPMLE,  $\pi_1$  known* is our estimator when  $\pi_1$  is known in the source population (Section 2.1 of the main paper); *Bias* is the mean bias; *CI (%)* is the coverage in percent of a nominal 95% confidence interval (calculated using the asymptotic standard error); *MSE Eff* is the mean squared error efficiency of our method compared to logistic regression, averaged over  $G$ , over  $X$  and over the  $G * X$  interactions.

Table S.6. Results of 1000 simulations with  $G$  as described in Section 3 of the main paper, but  $X \sim \mathbf{N}(0.032G_3, 1)$ . We compare our semiparametric pseudolikelihood estimator to ordinary logistic regression. Three simulations were performed with sample sizes of (1000, 2000, 3000) cases and controls each

|                                  | $\beta_{G1}$   | $\beta_{G2}$ | $\beta_{G3}$ | $\beta_{G4}$ | $\beta_{G5}$ | $\beta_X$ | $\beta_{G1X}$      | $\beta_{G2X}$ | $\beta_{G3X}$ | $\beta_{G4X}$ | $\beta_{G5X}$ |
|----------------------------------|----------------|--------------|--------------|--------------|--------------|-----------|--------------------|---------------|---------------|---------------|---------------|
| True                             | 0.18           | 0.18         | 0.00         | 0.18         | 0.00         | 0.55      | 0.35               | 0.00          | 0.00          | 0.35          | 0.00          |
| Logistic: 1000 cases             |                |              |              |              |              |           |                    |               |               |               |               |
| Bias                             | -0.01          | 0.00         | 0.00         | 0.00         | 0.00         | 0.00      | 0.01               | 0.00          | 0.00          | 0.01          | 0.01          |
| CI (%)                           | 95.5           | 94.4         | 95.2         | 96.2         | 95.3         | 94.7      | 94.9               | 94.0          | 94.9          | 95.5          | 94.9          |
| Logistic: 2000 cases             |                |              |              |              |              |           |                    |               |               |               |               |
| Bias                             | 0.00           | 0.00         | -0.01        | 0.00         | 0.00         | 0.01      | 0.00               | 0.00          | 0.00          | 0.00          | 0.00          |
| CI (%)                           | 94.0           | 94.1         | 94.4         | 94.6         | 94.9         | 95.2      | 95.5               | 95.1          | 95.5          | 94.0          | 94.7          |
| Logistic: 3000 cases             |                |              |              |              |              |           |                    |               |               |               |               |
| Bias                             | 0.00           | 0.00         | 0.00         | 0.00         | -0.01        | 0.00      | 0.00               | 0.00          | 0.00          | 0.00          | 0.00          |
| CI (%)                           | 95.9           | 94.2         | 94.1         | 94.8         | 94.3         | 95.1      | 95.4               | 95.9          | 95.8          | 92.9          | 94.4          |
| SPMLE, $\pi_1$ known: 1000 cases |                |              |              |              |              |           |                    |               |               |               |               |
| Bias                             | 0.00           | 0.00         | 0.00         | 0.00         | 0.00         | -0.04     | 0.01               | 0.00          | 0.06          | 0.01          | 0.00          |
| CI (%)                           | 95.6           | 94.8         | 95.5         | 96.3         | 95.3         | 92.0      | 94.8               | 95.5          | 88.3          | 95.7          | 96.2          |
| MSE Eff                          | All $G$ : 1.07 |              |              | X: 1.20      |              |           | All $G * X$ : 2.12 |               |               |               |               |
| SPMLE, $\pi_1$ known: 2000 cases |                |              |              |              |              |           |                    |               |               |               |               |
| Bias                             | 0.00           | 0.00         | -0.01        | 0.00         | 0.00         | -0.04     | 0.01               | 0.00          | 0.06          | 0.00          | 0.00          |
| CI (%)                           | 95.2           | 94.4         | 94.5         | 94.0         | 94.8         | 89.4      | 95.0               | 94.8          | 82.3          | 94.9          | 94.6          |
| MSE Eff                          | All $G$ : 1.06 |              |              | X: 0.95      |              |           | All $G * X$ : 1.95 |               |               |               |               |
| SPMLE, $\pi_1$ known: 3000 cases |                |              |              |              |              |           |                    |               |               |               |               |
| Bias                             | 0.00           | 0.00         | 0.00         | 0.00         | -0.01        | -0.04     | 0.00               | 0.00          | 0.06          | 0.00          | 0.00          |
| CI (%)                           | 95.3           | 94.7         | 94.0         | 95.3         | 94.2         | 84.5      | 94.4               | 94.9          | 75.7          | 95.0          | 94.8          |
| MSE Eff                          | All $G$ : 1.06 |              |              | X: 0.76      |              |           | All $G * X$ : 1.82 |               |               |               |               |

*Logistic* is ordinary logistic regression; *SPMLE,  $\pi_1$  known* is our estimator when  $\pi_1$  is known in the source population (Section 2.1 of the main paper); *Bias* is the mean bias; *CI (%)* is the coverage in percent of a nominal 95% confidence interval (calculated using the asymptotic standard error); *MSE Eff* is the mean squared error efficiency of our method compared to logistic regression, averaged over  $G$ , over  $X$  and over the  $G * X$  interactions.

S-11. THE SIMULATION IN TABLE 1 OF THE MAIN PAPER WITH COMPONENTWISE  
MEAN SQUARED ERROR EFFICIENCIES

Table S.7. Results of 1000 simulations as described in Section 3 of the main paper, with mean bias, coverage probabilities of a 95% nominal confidence interval, and mean squared error efficiency of our semiparametric pseudolikelihood estimator compared to ordinary logistic regression. The sample sizes were performed with 500 cases and 500 controls, and again with 1000 cases and 1000 controls

| True                             | $\beta_{G1}$ | $\beta_{G2}$ | $\beta_{G3}$ | $\beta_{G4}$ | $\beta_{G5}$ | $\beta_X$ | $\beta_{G1X}$ | $\beta_{G2X}$ | $\beta_{G3X}$ | $\beta_{G4X}$ | $\beta_{G5X}$ |
|----------------------------------|--------------|--------------|--------------|--------------|--------------|-----------|---------------|---------------|---------------|---------------|---------------|
|                                  | 0.18         | 0.18         | 0.00         | 0.18         | 0.00         | 0.41      | 0.26          | 0.00          | 0.00          | 0.26          | 0.00          |
| Logistic, 500 cases              |              |              |              |              |              |           |               |               |               |               |               |
| Bias                             | 0.02         | -0.02        | 0.02         | -0.01        | 0.01         | 0.00      | 0.00          | 0.02          | -0.02         | 0.02          | -0.01         |
| CI (%)                           | 94.7         | 94.9         | 94.8         | 94.5         | 95.2         | 96.4      | 94.3          | 93.6          | 94.3          | 94.9          | 95.4          |
| Logistic, 1000 cases             |              |              |              |              |              |           |               |               |               |               |               |
| Bias                             | 0.00         | 0.01         | 0.00         | 0.01         | -0.01        | 0.01      | 0.01          | -0.01         | 0.00          | 0.00          | 0.01          |
| CI (%)                           | 94.3         | 95.2         | 95.7         | 95.1         | 94.7         | 94.6      | 94.9          | 94.2          | 94.5          | 96.0          | 94.2          |
| SPMLE, Rare, 500 cases           |              |              |              |              |              |           |               |               |               |               |               |
| Bias                             | 0.02         | -0.01        | 0.02         | 0.00         | 0.00         | 0.01      | -0.01         | 0.01          | -0.02         | -0.01         | 0.00          |
| CI (%)                           | 95.0         | 95.8         | 94.2         | 94.5         | 95.5         | 95.6      | 95.8          | 95.3          | 94.3          | 95.0          | 95.9          |
| MSE Eff                          | 1.37         | 1.34         | 1.23         | 1.27         | 1.27         | 1.29      | 2.44          | 2.13          | 1.87          | 1.91          | 2.22          |
| SPMLE, Rare, 1000 cases          |              |              |              |              |              |           |               |               |               |               |               |
| Bias                             | 0.01         | 0.00         | 0.00         | 0.02         | -0.01        | 0.02      | -0.02         | -0.01         | 0.01          | -0.02         | 0.01          |
| CI (%)                           | 95.2         | 95.4         | 96.4         | 95.8         | 95.3         | 95.1      | 95.4          | 94.8          | 96.1          | 95.5          | 94.9          |
| MSE Eff                          | 1.35         | 1.25         | 1.29         | 1.25         | 1.24         | 1.26      | 2.36          | 2.00          | 2.19          | 2.02          | 2.21          |
| SPMLE, $\pi_1$ known: 500 cases  |              |              |              |              |              |           |               |               |               |               |               |
| Bias                             | 0.01         | -0.01        | 0.02         | -0.01        | 0.00         | 0.00      | 0.01          | 0.01          | -0.02         | 0.01          | 0.00          |
| CI (%)                           | 95.0         | 95.7         | 94.3         | 94.4         | 95.5         | 95.7      | 95.4          | 95.1          | 94.3          | 94.9          | 95.7          |
| MSE Eff                          | 1.39         | 1.34         | 1.22         | 1.26         | 1.28         | 1.28      | 2.31          | 2.01          | 1.78          | 1.81          | 2.09          |
| SPMLE, $\pi_1$ known: 1000 cases |              |              |              |              |              |           |               |               |               |               |               |
| Bias                             | 0.00         | 0.00         | 0.00         | 0.01         | -0.01        | 0.01      | 0.00          | -0.01         | 0.01          | -0.01         | 0.01          |
| CI (%)                           | 95.1         | 95.5         | 96.4         | 95.8         | 95.0         | 95.5      | 95.6          | 94.6          | 95.9          | 95.2          | 94.5          |
| MSE Eff                          | 1.36         | 1.25         | 1.28         | 1.27         | 1.24         | 1.28      | 2.25          | 1.91          | 2.06          | 1.96          | 2.08          |

*Logistic* is ordinary logistic regression; *SPMLE, Rare* is our estimator using the rare disease approximation with unknown  $\pi_1$ , Section 2.2; *SPMLE,  $\pi_1$  known* is our estimator when  $\pi_1$  is known in the source population, Section 2.1; *CI (%)* is the coverage in percent of a nominal 95% confidence interval, calculated using the asymptotic standard error; *MSE Eff* is the mean squared error efficiency of our method compared to logistic regression.



S.12. SKEWNESS, KURTOSIS AND QQ-PLOTS FOR THE SIMULATION IN TABLE 1 OF THE  
MAIN PAPER

195

Table S.8 gives skewness and kurtosis for the simulation in Table 1 of the main paper with 1000 cases and controls.

Figure S.1 presents q–q plots for the main effects for  $(G_1, \dots, G_5, X)$  in the same simulation.

Figure S.2 presents q–q plots for the interaction effects for  $X$  and  $(G_1, \dots, G_5)$  in the same simulation.

200

Table S.8. *Skewness and kurtosis for the simulation in Table 1 of the main paper with 1000 cases and controls. Kurtosis = 0 for the normal distribution*

| Skewness | Kurtosis |
|----------|----------|
| -0.02    | -0.08    |
| -0.05    | 0.12     |
| -0.13    | 0.07     |
| -0.02    | -0.15    |
| 0.06     | -0.04    |
| -0.21    | 0.15     |
| -0.01    | -0.20    |
| -0.03    | -0.10    |
| 0.04     | 0.11     |
| 0.09     | -0.13    |
| 0.01     | -0.06    |
| 0.14     | 0.25     |

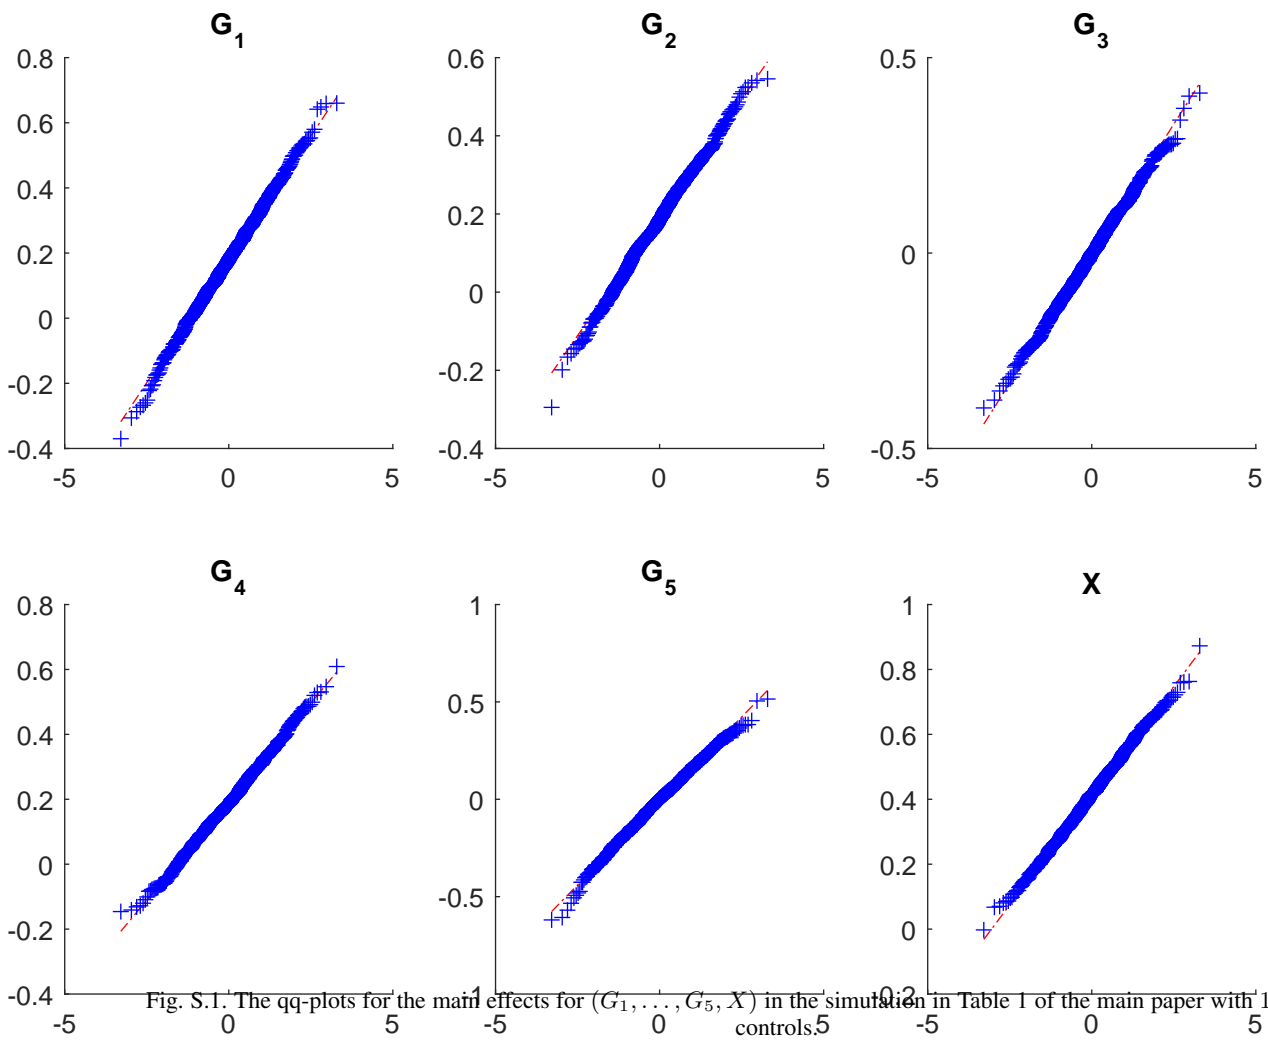

Fig. S.1. The qq-plots for the main effects for  $(G_1, \dots, G_5, X)$  in the simulation in Table 1 of the main paper with 1000 cases and

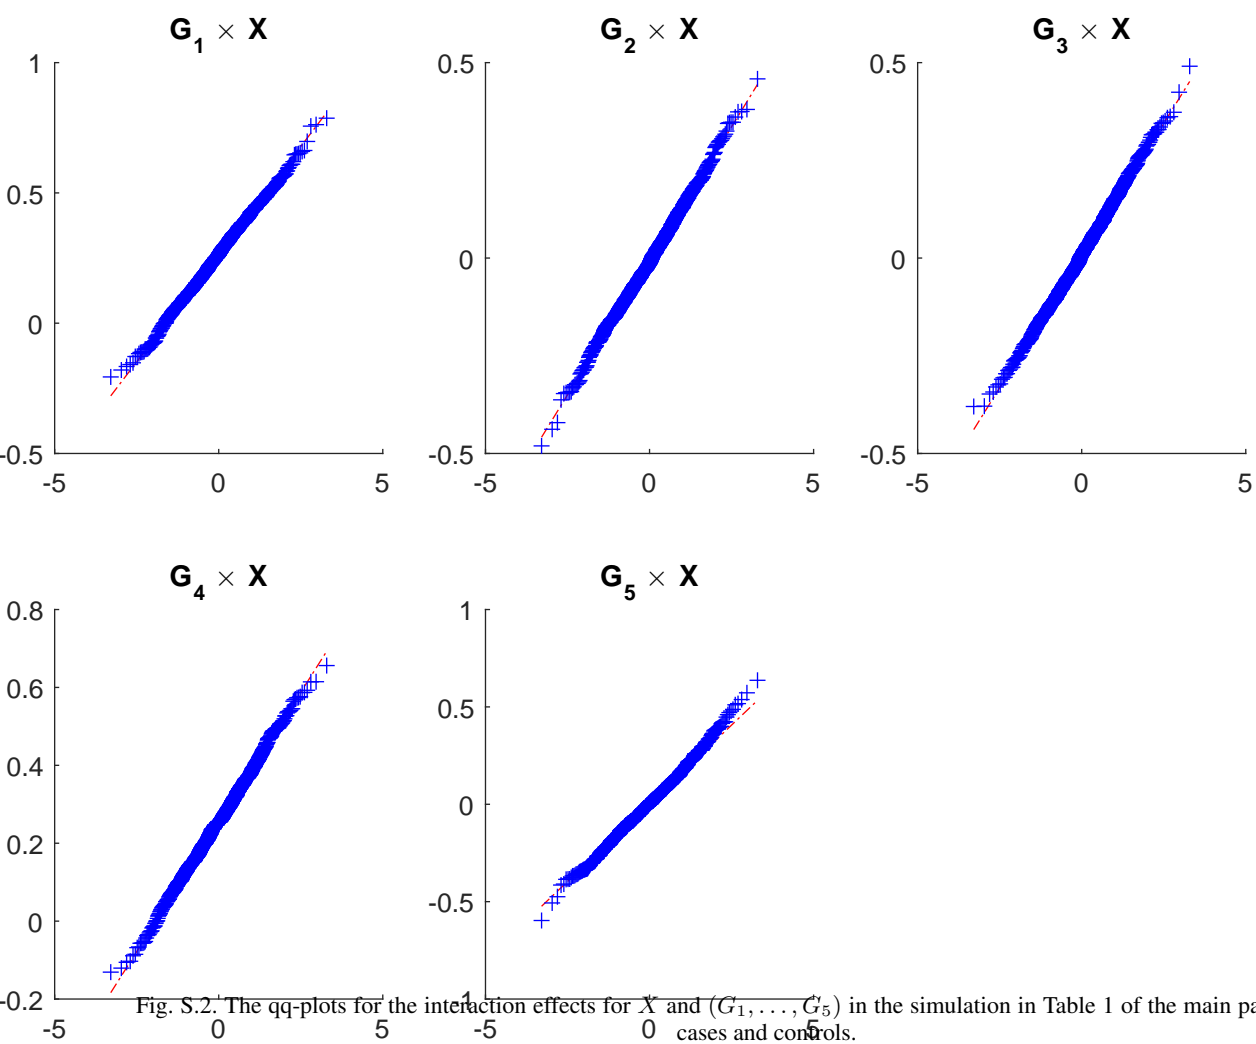

Fig. S.2. The qq-plots for the interaction effects for  $X$  and  $(G_1, \dots, G_5)$  in the simulation in Table 1 of the main paper with 1000 cases and controls.

S-13. THE SIMULATION IN TABLE 1 OF THE MAIN PAPER WITH 500 CASES AND  
CONTROLS

Table S.9. Results of 1000 simulations as described in §3 of the main paper, with mean bias, coverage probabilities of a 95% nominal confidence interval, and mean squared error efficiency of our semiparametric pseudolikelihood estimator compared to ordinary logistic regression.

The simulations were performed with 500 cases and 500 controls

|                                 | $\beta_{G1}$   | $\beta_{G2}$ | $\beta_{G3}$ | $\beta_{G4}$ | $\beta_{G5}$ | $\beta_X$ | $\beta_{G1X}$      | $\beta_{G2X}$ | $\beta_{G3X}$ | $\beta_{G4X}$ | $\beta_{G5X}$ |
|---------------------------------|----------------|--------------|--------------|--------------|--------------|-----------|--------------------|---------------|---------------|---------------|---------------|
| True                            | 0.18           | 0.18         | 0.00         | 0.18         | 0.00         | 0.41      | 0.26               | 0.00          | 0.00          | 0.26          | 0.00          |
| Logistic: 500 cases             |                |              |              |              |              |           |                    |               |               |               |               |
| Bias                            | 0.02           | -0.02        | 0.02         | -0.01        | 0.01         | 0.00      | 0.00               | 0.02          | -0.02         | 0.02          | -0.01         |
| CI (%)                          | 94.7           | 94.9         | 94.8         | 94.5         | 95.2         | 96.4      | 94.3               | 93.6          | 94.3          | 94.9          | 95.4          |
| SPMLE, Rare: 500 cases          |                |              |              |              |              |           |                    |               |               |               |               |
| Bias                            | 0.02           | -0.01        | 0.02         | 0.00         | 0.00         | 0.01      | -0.01              | 0.01          | -0.02         | -0.01         | 0.00          |
| CI (%)                          | 95.0           | 95.8         | 94.2         | 94.5         | 95.5         | 95.6      | 95.8               | 95.3          | 94.3          | 95.0          | 95.9          |
| Avg MSE Eff                     | All $G$ : 1.30 |              |              | X: 1.29      |              |           | All $G * X$ : 2.13 |               |               |               |               |
| SPMLE, $\pi_1$ known: 500 cases |                |              |              |              |              |           |                    |               |               |               |               |
| Bias                            | 0.01           | -0.01        | 0.02         | -0.01        | 0.00         | 0.00      | 0.01               | 0.01          | -0.02         | 0.01          | 0.00          |
| CI (%)                          | 95.0           | 95.7         | 94.3         | 94.4         | 95.5         | 95.7      | 95.4               | 95.1          | 94.3          | 94.9          | 95.7          |
| Avg MSE Eff                     | All $G$ : 1.30 |              |              | X: 1.28      |              |           | All $G * X$ : 2.02 |               |               |               |               |

*Logistic* is ordinary logistic regression; *SPMLE, Rare* is our estimator using the rare disease approximation with unknown  $\pi_1$  (§2.2); *SPMLE,  $\pi_1$  known* is our estimator when  $\pi_1$  is known in the source population (§2.1); *CI (%)* is the coverage in percent of a nominal 95% confidence interval (calculated using the asymptotic standard error); *Avg MSE Eff* is the mean squared error efficiency of our method compared to logistic regression averaged over  $G$ , over  $X$  and over the  $G * X$  interactions, respectively.

## REFERENCES

- CHATTERJEE, N. & CARROLL, R. J. (2005). Semiparametric maximum likelihood estimation in case-control studies of gene-environment interactions. *Biometrika* **92**, 399–418. 205
- CHEN, Y. H., CHATTERJEE, N. & CARROLL, R. J. (2009). Shrinkage estimators for robust and efficient inference in haplotype-based case-control studies. *J. Am. Statist. Assoc.* **104**, 220–233.
- MA, Y. (2010). A semiparametric efficient estimator in case-control studies. *Bernoulli* **16**, 585–603.
- MUKHERJEE, B. & CHATTERJEE, N. (2008). Exploiting gene-environment independence for analysis of case-control studies: An empirical bayes-type shrinkage estimator to trade-off between bias and efficiency. *Biometrics* **64**, 685–694. 210
- VAN DER VAART, A. W. (1998). *Asymptotic Statistics*. Cambridge University Press.
- WEI, J., CARROLL, R. J., MULLER, U., VAN KEILEGOM, I. & CHATTERJEE, N. (2013). Locally efficient estimation for homoscedastic regression in the secondary analysis of case-control data. *J. R. Statist. Soc. B* **75**, 185–206. 215
